# Supplementary material for: The Ideotype for Seed Size: A Model Examining the Relationship between Seed Size and Actual Yield in Pea
Source: Hindawi journal article supplement (doi:10.1155/2018/9658707), 2018-08-01
Supplement: f1 [file 9658707.f1.xlsx]

## Sheet: pod size calculations
	surface area of a cylinder= 2πr2+2πrh	52 seeds per plant
Height	holding radius constant at .5 cm varying pod length	POD NUMBER holding seed width constant at .25cm	Pod surface area
0.5	1.1775	15	17.6625
1	1.9625	7.5	14.7188
1.5	2.7475	5	13.7375
2	3.5325	3.75	13.2469
2.5	4.3175	3	12.9525
3	5.1025	2.5	12.7562
3.5	5.8875	2.14286	12.6161
4	6.6725	1.875	12.5109
4.5	7.4575	1.66667	12.4292
5	8.2425	1.5	12.3637
5.5	9.0275	1.36364	12.3102
6	9.8125	1.25	12.2656
6.5	10.5975	1.15385	12.2279
7	11.3825	1.07143	12.1955
7.5	12.1675	1	12.1675
8	12.9525	0.9375	12.143
8.5	13.7375	0.882353	12.1213
9	14.5225	0.833333	12.1021
9.5	15.3075	0.789474	12.0849
10	16.0925	0.75	12.0694

## Sheet: Seed size calculations
The final function for seed size is below and it uses the following equations.
The green columns can be modified. Do not modify the gray, pink or yellow columns. The pink column is Hundred seed weight, which increases in each row. The Yellow columns are the result columns.
Seeding Rate= (seeding rate/m2)/(square feet in a meter)*(square feet in an acre). This function does not consider the fact that increasing the seeding rate will increase yield, it uses seeding rate only to determine actual seed yield (Yield at harvest minus the weight of the seed planted).
Seed cost multiplier (cost of seed planted per lb/ value of harvested grain per lb)
Mass per seed (Mass)= 100 seed weight/100. This can be varied or held constant at a specific value in order to determine the ideal seed weight..
Volume of a seed=(Mass)/(seed density) Seed density is approximately 1.176g/cm3.
Radius of a seed (r) = The radius of a seed is found by using the formula for the volume of a sphere (volume=4/3 πr^3) and solving for the radius. Therefore r={(Volume)/((4/3)*π)}^(1/3).
Seed diameter (Seed Diam)=2*radius of the seed
Pod Length = This can be varied in the function or held constant at a specific value. Pod length is generally about 6cm in peas, but this varies depending on the variety. This parameter affects seeds per pod, and pod number.
Correction for space between seeds in a pod= Estimated to be approximately 1.1 based on pod biomass, this factor accounts for the fact that there is often space between the seeds in a dry pod. The multiplier, which represents the actual space taken up by the seed divided by the dry seed diameter, accounts for the pod wall material required to produce a seed if the seed actually occupies more spac…
Pod Width=Seed diameter +pod wall thickness*2. Pod wall thickness was determined empirically to be approximately .194 mm on average.
Photosynthates= This is the total amount of sugars and other nutrients available for partitioning into seeds, seed testa, and pods (in units of grams per plant). This parameter is held constant at an arbitrarily determined value. This function assumes that pea plant sizes, leaf number, and other factors are the same. Only seed size and a few other yield parameters are varied. The percentage of ph…
Pod number based on amount of photosynthate produced (Pod #)= It is important to note that to produce the same amount of photosynthate per plant, pod number must vary when seed size varies. Pod number can be determined with the following formula. Pod # = photosynthates/ {(mass per seed*(h /seed diameter))+((πr12h- πr2h)*pod density)}. In this case h=pod length, r1=half of the pod width, and r=see…
Amount of photosynthate allocated to seed= This is number of grams of photosynthate that is allocated to the seed and not allocated to the pods. The amount of photosynthate allocated to the seed is dependent on seed size and pod length. The formula for the amount of photosynthate allocated to seed=Mass*(Pod L/Seed Diam)*Pod#.
% Allocated to Seed=(Photosynthate allocated to seed/Photosynthate)*100
Expected yield potential= This will vary depending on the environment and location. According to the National Agricultural Statistics Service the average yield in Montana during the 15 year period between 2001 and 2016 was 1548 lbs per acre. Yield potential has a dramatic effect on the ideal seed size. Smaller expected yields indicate that a smaller seed size is ideal, but higher yielding areas r…
Expected weight of yield components= This is the total weight of pods, seed, and seed testa produced by a specific plant. The relative proportion of pods, seeds, and seed testa is dependent on seed diameter, and the total amount of pod material required to achieve a specific yield potential decreases with increases in seed size. In general, the weight of seed is 85% of the weight of the total wei…
Predicted Yield at harvest= the expected yield at harvest of seed given a specific seed weight. Yield at harvest=(% allocated to seed/100)*Expected weight of yield components. Expected yield at harvest increases with increasing seed weight because less photosynthate is going to pod weight.
Actual seed yield= Yield at harvest minus the weight of seed planted. This is essentially parabolic. It reaches a high point at the ideal seed weight and then it starts to decline.
Volume of seed that is occupied by the testa = This is part of the volume of a seed that is composed of the seed coat. The seed coat (testa) is the outer surface of the seed, and it is often stripped from the seed during processing. It has an average thickness of .0125cm. The volume can be found by determining the volume of a seed and subtracting the volume of the seed without its testa. Volume o…
Mass of testa=Volume of testa*seed density
Actual seed yield minus testa=Mass-mass of testa
Number of g of seed= the number of grams of photosynthate dedicated to the seed without its testa. Number of g of seed=Number of seeds per pod*pod number*actual seed yield minus testa
Percent of photosynthates going to seed without its testa= (number of g of seed/Photosynthates)*100
Yield minus the weight of seed testa= Expected weight of yield components*Percent of photosynthates going to seed without its testa.
Weight of seeds planted with varying 100 seed weights= (Total seeds per acre*Mass per seed)*the number of grams per pound =453.59237.
_________________________________________
Assumptions of the function:
This function assumes that seed weight (which also influences pod size and pod number) is the only characteristic of a plant that varies. Therefore this function is designed to determine the ideal 100 seed weight for a specific yield potential.
This function assumes that the amount of photosynthate available to produce either pods or seeds is fixed since other characteristics of a plant are assumed to not vary.
This function assumes that the amount of photosynthate available to produce either pods or seeds is equal. In reality, it probably requires less energy to produce a pound of pods than it does a pound of seed. If that is the case, the ideal 100 seed weight would be lower than predicted in this function
This function does not account for the weight of the peduncle, which attaches the pod to the stem. The peduncle generally is fairly short and light and it weighs approximately 10% of the weight of the pods. Each peduncle can support 2 pods.
This function assumes that the pods and peduncle are not photosynthetic. In this function they do not contribute to photosynthate
This function assumes that the number of pods per plant and seed number can vary.
This function assumes that pea seed costs as much as harvested seeds, but this is not likely to be the case. However, in many cases, growers do use their own seed.
This function assumes that pea pods are shaped like a cylinder. This function does not account for the actual shape of the pod. The formula for the volume of a cylinder are expected to be a fairly good approximation of the shape of a pea pod.
The green columns can be modified. Do not modify the gray, pink or yellow columns. The pink column is Hundred seed weight, which increases in each row. The Yellow columns are the result columns. The orange column is actual seed yield, which is the main result of the function. The highest value for actual seed yield is located at the ideal seed size.
Change every green cell in any of the green columns to a specific value, and observe the effect on the ideal seed size.
Seeding Rate (seeds/m2) This function does not take into account the correlation between seeding rate and yield. See row 3	Seed cost multiplier (cost of seed planted per lb/ value of harvested grain per lb)	Total Seeds per acre	Volume per seed	Mass per seed	100 seed weight	pod length (without tips) assuming all seeds are packed tightly into pod	Correction for space between seeds in a pod (average length within each pod occupied per seed/ dry seed diameter)	radius of seed (cm)	Diameter of seed (cm)	Pod width	Photosynthate (g of pods and seed produced per plant)	pod number based on photosynthate	Grams of photosynthate allocated to seed (out of 10)	% of Photosynthates allocated to seed	Expected Yield potential lbs/A (1548lbs/A=average yield in Montana During 2001-2016)	Expected Yield potential in kg/ha	Expected Weight of Yield Components (pods,seed, seed testa) (held constant at (Yield potential/.85) units in lbs/A)	Predicted Yield at Harvest (Lbs/A	Predicted Yield at Harvest (kg/ha)	Actual seed yield (Lbs./A)	Actual seed yield (kg/ha)	volume of seed that is occupied by the testa	mass of testa	actual seed yield minus testa	number of g of seed	Percent of photosynthates going to a seed without its testa	Yield minus weight of seed testa and weight of planted seed (lbs./A)	Yield minus weight of seed testa and weight of planted seed (kg/ha)	Total weight of seeds planted (varies according to seed weight)
80	1	323749	0.042517	0.05	5	6	1.1	0.216517	0.433033	0.471833	10	12.4452	7.83804	78.3804	1548	1735.08	1821.18	1427.45	1599.95	1391.76	1559.95	0.006967	0.00819319	0.0418068	6.55367	0.655367	1157.85	1297.78	35.6872
80	1	323749	0.0467687	0.055	5.5	6	1.1	0.223506	0.447012	0.485812	10	11.7618	7.89362	78.9362	1548	1735.08	1821.18	1437.57	1611.3	1398.31	1567.3	0.00743776	0.0087468	0.0462532	6.63828	0.663828	1169.69	1311.05	39.2559
80	1	323749	0.0510204	0.06	6	6	1.1	0.230083	0.460167	0.498967	10	11.1689	7.94339	79.4339	1548	1735.08	1821.18	1446.63	1621.46	1403.81	1573.46	0.00789485	0.00928434	0.0507157	6.71424	0.671424	1179.96	1322.56	42.8246
80	1	323749	0.0552721	0.065	6.5	6	1.1	0.236305	0.47261	0.51141	10	10.6485	7.98835	79.8835	1548	1735.08	1821.18	1454.82	1630.64	1408.43	1578.64	0.00833974	0.00980754	0.0551925	6.78302	0.678302	1188.91	1332.6	46.3933
80	1	323749	0.0595238	0.07	7	6	1.1	0.242215	0.48443	0.52323	10	10.1871	8.02927	80.2927	1548	1735.08	1821.18	1462.27	1638.99	1412.31	1582.99	0.00877367	0.0103178	0.0596822	6.84578	0.684578	1196.77	1341.41	49.962
80	1	323749	0.0637755	0.075	7.5	6	1.1	0.24785	0.495699	0.534499	10	9.77459	8.06678	80.6678	1548	1735.08	1821.18	1469.1	1646.65	1415.57	1586.65	0.00919764	0.0108164	0.0641836	6.90339	0.690339	1203.7	1349.17	53.5307
80	1	323749	0.0680272	0.08	8	6	1.1	0.253239	0.506479	0.545279	10	9.40307	8.10134	81.0134	1548	1735.08	1821.18	1475.4	1653.7	1418.3	1589.7	0.00961253	0.0113043	0.0686957	6.95659	0.695659	1209.82	1356.03	57.0995
80	1	323749	0.0722789	0.085	8.5	6	1.1	0.258409	0.516818	0.555618	10	9.06629	8.13335	81.3335	1548	1735.08	1821.18	1481.23	1660.23	1420.56	1592.23	0.0100191	0.0117824	0.0732176	7.00593	0.700593	1215.24	1362.1	60.6682
80	1	323749	0.0765306	0.09	9	6	1.1	0.26338	0.526759	0.565559	10	8.75927	8.16313	81.6313	1548	1735.08	1821.18	1486.65	1666.31	1422.41	1594.31	0.0104179	0.0122515	0.0777485	7.0519	0.70519	1220.04	1367.48	64.2369
80	1	323749	0.0807823	0.095	9.5	6	1.1	0.268169	0.536339	0.575139	10	8.47795	8.19094	81.9094	1548	1735.08	1821.18	1491.71	1671.99	1423.91	1595.99	0.0108096	0.0127121	0.0822879	7.0949	0.70949	1224.3	1372.26	67.8056
80	1	323749	0.085034	0.1	10	6	1.1	0.272794	0.545588	0.584388	10	8.21901	8.217	82.17	1548	1735.08	1821.18	1496.46	1677.31	1425.09	1597.31	0.0111946	0.0131649	0.0868351	7.13524	0.713524	1228.08	1376.49	71.3743
80	1	323749	0.0892857	0.105	10.5	6	1.1	0.277267	0.554534	0.593334	10	7.9797	8.24151	82.4151	1548	1735.08	1821.18	1500.92	1682.31	1425.98	1598.31	0.0115735	0.0136104	0.0913896	7.17322	0.717322	1231.43	1380.25	74.943
80	1	323749	0.0935374	0.11	11	6	1.1	0.2816	0.563199	0.601999	10	7.75771	8.26461	82.6461	1548	1735.08	1821.18	1505.13	1687.03	1426.62	1599.03	0.0119465	0.014049	0.095951	7.20907	0.720907	1234.39	1383.56	78.5118
80	1	323749	0.0977891	0.115	11.5	6	1.1	0.285803	0.571607	0.610407	10	7.55109	8.28646	82.8646	1548	1735.08	1821.18	1509.11	1691.49	1427.03	1599.49	0.012314	0.0144812	0.100519	7.243	0.7243	1237	1386.49	82.0805
80	1	323749	0.102041	0.12	12	6	1.1	0.289887	0.579774	0.618574	10	7.35819	8.30716	83.0716	1548	1735.08	1821.18	1512.88	1695.71	1427.23	1599.71	0.0126763	0.0149073	0.105093	7.27518	0.727518	1239.29	1389.06	85.6492
80	1	323749	0.106293	0.125	12.5	6	1.1	0.293858	0.587717	0.626517	10	7.17759	8.32682	83.2682	1548	1735.08	1821.18	1516.46	1699.73	1427.24	1599.73	0.0130337	0.0153277	0.109672	7.30577	0.730577	1241.29	1391.3	89.2179
80	1	323749	0.110544	0.13	13	6	1.1	0.297725	0.595451	0.634251	10	7.00806	8.34553	83.4553	1548	1735.08	1821.18	1519.87	1703.55	1427.08	1599.55	0.0133866	0.0157426	0.114257	7.33491	0.733491	1243.03	1393.25	92.7866
80	1	323749	0.114796	0.135	13.5	6	1.1	0.301494	0.602989	0.641789	10	6.84854	8.36336	83.6336	1548	1735.08	1821.18	1523.12	1707.19	1426.76	1599.19	0.013735	0.0161523	0.118848	7.36271	0.736271	1244.52	1394.93	96.3553
80	1	323749	0.119048	0.14	14	6	1.1	0.305172	0.610343	0.649143	10	6.69811	8.3804	83.804	1548	1735.08	1821.18	1526.22	1710.66	1426.29	1598.66	0.0140792	0.0165571	0.123443	7.38929	0.738929	1245.8	1396.35	99.9241
80	1	323749	0.123299	0.145	14.5	6	1.1	0.308762	0.617524	0.656324	10	6.55595	8.3967	83.967	1548	1735.08	1821.18	1529.19	1713.99	1425.69	1597.99	0.0144194	0.0169572	0.128043	7.41473	0.741473	1246.86	1397.55	103.493
80	1	323749	0.127551	0.15	15	6	1.1	0.312271	0.624542	0.663342	10	6.42136	8.41231	84.1231	1548	1735.08	1821.18	1532.03	1717.18	1424.97	1597.18	0.0147559	0.0173529	0.132647	7.43912	0.743912	1247.73	1398.52	107.061
80	1	323749	0.131803	0.155	15.5	6	1.1	0.315703	0.631406	0.670206	10	6.2937	8.42729	84.2729	1548	1735.08	1821.18	1534.76	1720.23	1424.13	1596.23	0.0150886	0.0177442	0.137256	7.46254	0.746254	1248.43	1399.3	110.63
80	1	323749	0.136054	0.16	16	6	1.1	0.319062	0.638123	0.676923	10	6.17241	8.44167	84.4167	1548	1735.08	1821.18	1537.38	1723.17	1423.18	1595.17	0.0154179	0.0181315	0.141869	7.48505	0.748505	1248.96	1399.9	114.199
80	1	323749	0.140306	0.165	16.5	6	1.1	0.322351	0.644702	0.683502	10	6.05699	8.45551	84.5551	1548	1735.08	1821.18	1539.9	1726	1422.13	1594	0.0157439	0.0185148	0.146485	7.50671	0.750671	1249.34	1400.32	117.768
80	1	323749	0.144558	0.17	17	6	1.1	0.325575	0.65115	0.68995	10	5.94699	8.46884	84.6884	1548	1735.08	1821.18	1542.33	1728.72	1420.99	1592.72	0.0160666	0.0188944	0.151106	7.52759	0.752759	1249.57	1400.58	121.336
80	1	323749	0.14881	0.175	17.5	6	1.1	0.328736	0.657472	0.696272	10	5.84202	8.48169	84.8169	1548	1735.08	1821.18	1544.66	1731.34	1419.76	1591.34	0.0163863	0.0192703	0.15573	7.54772	0.754772	1249.67	1400.69	124.905
80	1	323749	0.153061	0.18	18	6	1.1	0.331838	0.663675	0.702475	10	5.74171	8.49408	84.9408	1548	1735.08	1821.18	1546.92	1733.87	1418.45	1589.87	0.016703	0.0196427	0.160357	7.56716	0.756716	1249.64	1400.66	128.474
80	1	323749	0.157313	0.185	18.5	6	1.1	0.334882	0.669764	0.708564	10	5.64573	8.50605	85.0605	1548	1735.08	1821.18	1549.1	1736.31	1417.06	1588.31	0.0170168	0.0200117	0.164988	7.58594	0.758594	1249.49	1400.49	132.043
80	1	323749	0.161565	0.19	19	6	1.1	0.337872	0.675745	0.714545	10	5.55379	8.51763	85.1763	1548	1735.08	1821.18	1551.21	1738.68	1415.6	1586.68	0.0173278	0.0203775	0.169622	7.60411	0.760411	1249.23	1400.2	135.611
80	1	323749	0.165816	0.195	19.5	6	1.1	0.34081	0.681621	0.720421	10	5.46562	8.52883	85.2883	1548	1735.08	1821.18	1553.25	1740.96	1414.07	1584.96	0.0176362	0.0207402	0.17426	7.62171	0.762171	1248.87	1399.79	139.18
80	1	323749	0.170068	0.2	20	6	1.1	0.343699	0.687398	0.726198	10	5.38098	8.53968	85.3968	1548	1735.08	1821.18	1555.23	1743.18	1412.48	1583.18	0.017942	0.0210998	0.1789	7.63875	0.763875	1248.4	1399.27	142.749
80	1	323749	0.17432	0.205	20.5	6	1.1	0.346539	0.693079	0.731879	10	5.29964	8.55019	85.5019	1548	1735.08	1821.18	1557.14	1745.32	1410.82	1581.32	0.0182454	0.0214565	0.183543	7.65528	0.765528	1247.84	1398.65	146.317
80	1	323749	0.178571	0.21	21	6	1.1	0.349334	0.698668	0.737468	10	5.2214	8.56039	85.6039	1548	1735.08	1821.18	1559	1747.4	1409.11	1579.4	0.0185463	0.0218104	0.18819	7.67132	0.767132	1247.2	1397.92	149.886
80	1	323749	0.182823	0.215	21.5	6	1.1	0.352085	0.70417	0.74297	10	5.14607	8.57029	85.7029	1548	1735.08	1821.18	1560.8	1749.43	1407.35	1577.43	0.0188448	0.0221615	0.192838	7.68689	0.768689	1246.46	1397.1	153.455
80	1	323749	0.187075	0.22	22	6	1.1	0.354793	0.709587	0.748387	10	5.07349	8.5799	85.799	1548	1735.08	1821.18	1562.55	1751.39	1405.53	1575.39	0.0191412	0.02251	0.19749	7.70202	0.770202	1245.65	1396.19	157.024
80	1	323749	0.191327	0.225	22.5	6	1.1	0.357461	0.714922	0.753722	10	5.00349	8.58924	85.8924	1548	1735.08	1821.18	1564.25	1753.29	1403.66	1573.29	0.0194353	0.0228559	0.202144	7.71673	0.771673	1244.76	1395.19	160.592
80	1	323749	0.195578	0.23	23	6	1.1	0.36009	0.720179	0.758979	10	4.93592	8.59833	85.9833	1548	1735.08	1821.18	1565.91	1755.15	1401.75	1571.15	0.0197273	0.0231993	0.206801	7.73105	0.773105	1243.8	1394.11	164.161
80	1	323749	0.19983	0.235	23.5	6	1.1	0.36268	0.725361	0.764161	10	4.87066	8.60717	86.0717	1548	1735.08	1821.18	1567.52	1756.95	1399.79	1568.95	0.0200172	0.0235402	0.21146	7.74498	0.774498	1242.77	1392.96	167.73
80	1	323749	0.204082	0.24	24	6	1.1	0.365234	0.730469	0.769269	10	4.80758	8.61578	86.1578	1548	1735.08	1821.18	1569.09	1758.71	1397.79	1566.71	0.0203051	0.0238788	0.216121	7.75856	0.775856	1241.67	1391.73	171.298
80	1	323749	0.208333	0.245	24.5	6	1.1	0.367753	0.735507	0.774307	10	4.74656	8.62417	86.2417	1548	1735.08	1821.18	1570.61	1760.42	1395.75	1564.42	0.020591	0.024215	0.220785	7.77178	0.777178	1240.51	1390.43	174.867
80	1	323749	0.212585	0.25	25	6	1.1	0.370238	0.740477	0.779277	10	4.6875	8.63234	86.3234	1548	1735.08	1821.18	1572.1	1762.09	1393.67	1562.09	0.020875	0.024549	0.225451	7.78468	0.778468	1239.29	1389.06	178.436
80	1	323749	0.216837	0.255	25.5	6	1.1	0.37269	0.745381	0.784181	10	4.6303	8.64032	86.4032	1548	1735.08	1821.18	1573.55	1763.72	1391.55	1559.72	0.0211572	0.0248809	0.230119	7.79726	0.779726	1238.01	1387.63	182.005
80	1	323749	0.221088	0.26	26	6	1.1	0.37511	0.750221	0.789021	10	4.57486	8.64809	86.4809	1548	1735.08	1821.18	1574.97	1765.31	1389.4	1557.31	0.0214376	0.0252106	0.234789	7.80954	0.780954	1236.68	1386.14	185.573
80	1	323749	0.22534	0.265	26.5	6	1.1	0.3775	0.754999	0.793799	10	4.5211	8.65569	86.5569	1548	1735.08	1821.18	1576.35	1766.86	1387.21	1554.86	0.0217162	0.0255383	0.239462	7.82153	0.782153	1235.3	1384.58	189.142
80	1	323749	0.229592	0.27	27	6	1.1	0.379859	0.759718	0.798518	10	4.46893	8.6631	86.631	1548	1735.08	1821.18	1577.7	1768.37	1384.99	1552.37	0.0219931	0.0258639	0.244136	7.83324	0.783324	1233.86	1382.97	192.711
80	1	323749	0.233844	0.275	27.5	6	1.1	0.38219	0.764379	0.803179	10	4.41829	8.67034	86.7034	1548	1735.08	1821.18	1579.02	1769.85	1382.74	1549.85	0.0222683	0.0261875	0.248812	7.84469	0.784469	1232.38	1381.31	196.279
80	1	323749	0.238095	0.28	28	6	1.1	0.384492	0.768984	0.807784	10	4.36909	8.67742	86.7742	1548	1735.08	1821.18	1580.31	1771.29	1380.46	1547.29	0.0225419	0.0265093	0.253491	7.85588	0.785588	1230.85	1379.59	199.848
80	1	323749	0.242347	0.285	28.5	6	1.1	0.386767	0.773534	0.812334	10	4.32129	8.68434	86.8434	1548	1735.08	1821.18	1581.57	1772.71	1378.16	1544.71	0.0228139	0.0268291	0.258171	7.86682	0.786682	1229.27	1377.83	203.417
80	1	323749	0.246599	0.29	29	6	1.1	0.389016	0.778032	0.816832	10	4.2748	8.69111	86.9111	1548	1735.08	1821.18	1582.81	1774.09	1375.82	1542.09	0.0230843	0.0271472	0.262853	7.87753	0.787753	1227.65	1376.01	206.986
80	1	323749	0.25085	0.295	29.5	6	1.1	0.391239	0.782478	0.821278	10	4.22959	8.69774	86.9774	1548	1735.08	1821.18	1584.01	1775.44	1373.46	1539.44	0.0233532	0.0274634	0.267537	7.88801	0.788801	1225.99	1374.15	210.554
80	1	323749	0.255102	0.3	30	6	1.1	0.393437	0.786874	0.825674	10	4.18558	8.70422	87.0422	1548	1735.08	1821.18	1585.19	1776.77	1371.07	1536.77	0.0236206	0.0277779	0.272222	7.89827	0.789827	1224.29	1372.25	214.123
80	1	323749	0.259354	0.305	30.5	6	1.1	0.395611	0.791221	0.830021	10	4.14273	8.71057	87.1057	1548	1735.08	1821.18	1586.35	1778.06	1368.66	1534.06	0.0238866	0.0280906	0.276909	7.90833	0.790833	1222.55	1370.3	217.692
80	1	323749	0.263605	0.31	31	6	1.1	0.397761	0.795522	0.834322	10	4.10099	8.71679	87.1679	1548	1735.08	1821.18	1587.48	1779.33	1366.22	1531.33	0.0241511	0.0284017	0.281598	7.91817	0.791817	1220.78	1368.31	221.26
80	1	323749	0.267857	0.315	31.5	6	1.1	0.399888	0.799776	0.838576	10	4.06031	8.72289	87.2289	1548	1735.08	1821.18	1588.59	1780.58	1363.76	1528.58	0.0244143	0.0287112	0.286289	7.92783	0.792783	1218.97	1366.28	224.829
80	1	323749	0.272109	0.32	32	6	1.1	0.401993	0.803985	0.842785	10	4.02066	8.72886	87.2886	1548	1735.08	1821.18	1589.68	1781.79	1361.28	1525.79	0.024676	0.029019	0.290981	7.93729	0.793729	1217.12	1364.21	228.398
80	1	323749	0.276361	0.325	32.5	6	1.1	0.404075	0.808151	0.846951	10	3.98198	8.73472	87.3472	1548	1735.08	1821.18	1590.75	1782.99	1358.78	1522.99	0.0249364	0.0293253	0.295675	7.94657	0.794657	1215.24	1362.11	231.967
80	1	323749	0.280612	0.33	33	6	1.1	0.406137	0.812274	0.851074	10	3.94425	8.74047	87.4047	1548	1735.08	1821.18	1591.79	1784.16	1356.26	1520.16	0.0251956	0.02963	0.30037	7.95568	0.795568	1213.33	1359.97	235.535
80	1	323749	0.284864	0.335	33.5	6	1.1	0.408178	0.816356	0.855156	10	3.90743	8.7461	87.461	1548	1735.08	1821.18	1592.82	1785.31	1353.72	1517.31	0.0254534	0.0299332	0.305067	7.96461	0.796461	1211.39	1357.79	239.104
80	1	323749	0.289116	0.34	34	6	1.1	0.410199	0.820398	0.859198	10	3.87147	8.75163	87.5163	1548	1735.08	1821.18	1593.83	1786.44	1351.15	1514.44	0.02571	0.0302349	0.309765	7.97338	0.797338	1209.42	1355.58	242.673
80	1	323749	0.293367	0.345	34.5	6	1.1	0.4122	0.8244	0.8632	10	3.83635	8.75706	87.5706	1548	1735.08	1821.18	1594.82	1787.55	1348.57	1511.55	0.0259653	0.0305352	0.314465	7.98199	0.798199	1207.42	1353.34	246.241
80	1	323749	0.297619	0.35	35	6	1.1	0.414182	0.828363	0.867163	10	3.80204	8.76239	87.6239	1548	1735.08	1821.18	1595.79	1788.64	1345.98	1508.64	0.0262194	0.030834	0.319166	7.99045	0.799045	1205.39	1351.06	249.81
80	1	323749	0.301871	0.355	35.5	6	1.1	0.416144	0.832289	0.871089	10	3.76851	8.76763	87.6763	1548	1735.08	1821.18	1596.74	1789.71	1343.36	1505.71	0.0264724	0.0311315	0.323869	7.99875	0.799875	1203.34	1348.76	253.379
80	1	323749	0.306122	0.36	36	6	1.1	0.418089	0.836178	0.874978	10	3.73572	8.77277	87.7277	1548	1735.08	1821.18	1597.68	1790.76	1340.73	1502.76	0.0267241	0.0314276	0.328572	8.00692	0.800692	1201.25	1346.43	256.948
80	1	323749	0.310374	0.365	36.5	6	1.1	0.420016	0.840032	0.878832	10	3.70366	8.77782	87.7782	1548	1735.08	1821.18	1598.6	1791.79	1338.08	1499.79	0.0269748	0.0317223	0.333278	8.01494	0.801494	1199.15	1344.06	260.516
80	1	323749	0.314626	0.37	37	6	1.1	0.421925	0.84385	0.88265	10	3.67229	8.78279	87.8279	1548	1735.08	1821.18	1599.5	1792.8	1335.42	1496.8	0.0272243	0.0320157	0.337984	8.02282	0.802282	1197.01	1341.67	264.085
80	1	323749	0.318878	0.375	37.5	6	1.1	0.423817	0.847634	0.886434	10	3.6416	8.78767	87.8767	1548	1735.08	1821.18	1600.39	1793.8	1332.74	1493.8	0.0274726	0.0323078	0.342692	8.03058	0.803058	1194.86	1339.26	267.654
80	1	323749	0.323129	0.38	38	6	1.1	0.425692	0.851385	0.890185	10	3.61156	8.79247	87.9247	1548	1735.08	1821.18	1601.26	1794.78	1330.04	1490.78	0.02772	0.0325987	0.347401	8.0382	0.80382	1192.68	1336.81	271.222
80	1	323749	0.327381	0.385	38.5	6	1.1	0.427551	0.855103	0.893903	10	3.58214	8.79719	87.9719	1548	1735.08	1821.18	1602.12	1795.74	1327.33	1487.74	0.0279662	0.0328883	0.352112	8.0457	0.80457	1190.47	1334.34	274.791
80	1	323749	0.331633	0.39	39	6	1.1	0.429394	0.858789	0.897589	10	3.55334	8.80184	88.0184	1548	1735.08	1821.18	1602.97	1796.69	1324.61	1484.69	0.0282114	0.0331766	0.356823	8.05308	0.805308	1188.25	1331.85	278.36
80	1	323749	0.335884	0.395	39.5	6	1.1	0.431221	0.862443	0.901243	10	3.52512	8.80641	88.0641	1548	1735.08	1821.18	1603.8	1797.62	1321.87	1481.62	0.0284556	0.0334637	0.361536	8.06034	0.806034	1186	1329.33	281.929
80	1	323749	0.340136	0.4	40	6	1.1	0.433033	0.866067	0.904867	10	3.49746	8.8109	88.109	1548	1735.08	1821.18	1604.62	1798.54	1319.12	1478.54	0.0286987	0.0337497	0.36625	8.06749	0.806749	1183.73	1326.79	285.497
80	1	323749	0.344388	0.405	40.5	6	1.1	0.43483	0.86966	0.90846	10	3.47036	8.81533	88.1533	1548	1735.08	1821.18	1605.43	1799.44	1316.36	1475.44	0.0289409	0.0340345	0.370966	8.07453	0.807453	1181.45	1324.23	289.066
80	1	323749	0.348639	0.41	41	6	1.1	0.436612	0.873225	0.912025	10	3.44379	8.81969	88.1969	1548	1735.08	1821.18	1606.22	1800.33	1313.59	1472.33	0.029182	0.0343181	0.375682	8.08145	0.808145	1179.14	1321.64	292.635
80	1	323749	0.352891	0.415	41.5	6	1.1	0.43838	0.87676	0.91556	10	3.41774	8.82398	88.2398	1548	1735.08	1821.18	1607	1801.21	1310.8	1469.21	0.0294223	0.0346006	0.380399	8.08828	0.808828	1176.81	1319.03	296.203
80	1	323749	0.357143	0.42	42	6	1.1	0.440134	0.880267	0.919067	10	3.39218	8.8282	88.282	1548	1735.08	1821.18	1607.77	1802.07	1308	1466.07	0.0296615	0.034882	0.385118	8.095	0.8095	1174.47	1316.41	299.772
80	1	323749	0.361395	0.425	42.5	6	1.1	0.441873	0.883746	0.922546	10	3.36711	8.83236	88.3236	1548	1735.08	1821.18	1608.53	1802.92	1305.19	1462.92	0.0298999	0.0351622	0.389838	8.10162	0.810162	1172.11	1313.76	303.341
80	1	323749	0.365646	0.43	43	6	1.1	0.443599	0.887199	0.925999	10	3.34251	8.83646	88.3646	1548	1735.08	1821.18	1609.28	1803.76	1302.37	1459.76	0.0301373	0.0354414	0.394559	8.10815	0.810815	1169.73	1311.09	306.91
80	1	323749	0.369898	0.435	43.5	6	1.1	0.445312	0.890624	0.929424	10	3.31836	8.84051	88.4051	1548	1735.08	1821.18	1610.01	1804.58	1299.53	1456.58	0.0303738	0.0357196	0.39928	8.11458	0.811458	1167.33	1308.4	310.478
80	1	323749	0.37415	0.44	44	6	1.1	0.447012	0.894023	0.932823	10	3.29466	8.84449	88.4449	1548	1735.08	1821.18	1610.74	1805.4	1296.69	1453.4	0.0306094	0.0359966	0.404003	8.12092	0.812092	1164.91	1305.7	314.047
80	1	323749	0.378401	0.445	44.5	6	1.1	0.448699	0.897397	0.936197	10	3.27138	8.84841	88.4841	1548	1735.08	1821.18	1611.45	1806.2	1293.84	1450.2	0.0308441	0.0362727	0.408727	8.12716	0.812716	1162.48	1302.97	317.616
80	1	323749	0.382653	0.45	45	6	1.1	0.450373	0.900746	0.939546	10	3.24853	8.85228	88.5228	1548	1735.08	1821.18	1612.16	1806.99	1290.97	1446.99	0.031078	0.0365477	0.413452	8.13333	0.813333	1160.04	1300.23	321.184
80	1	323749	0.386905	0.455	45.5	6	1.1	0.452035	0.90407	0.94287	10	3.22607	8.8561	88.561	1548	1735.08	1821.18	1612.85	1807.77	1288.1	1443.77	0.031311	0.0368217	0.418178	8.1394	0.81394	1157.58	1297.47	324.753
80	1	323749	0.391156	0.46	46	6	1.1	0.453685	0.907369	0.946169	10	3.20401	8.85986	88.5986	1548	1735.08	1821.18	1613.54	1808.53	1285.21	1440.53	0.0315432	0.0370948	0.422905	8.14539	0.814539	1155.1	1294.69	328.322
80	1	323749	0.395408	0.465	46.5	6	1.1	0.455322	0.910645	0.949445	10	3.18234	8.86357	88.6357	1548	1735.08	1821.18	1614.21	1809.29	1282.32	1437.29	0.0317745	0.0373668	0.427633	8.15131	0.815131	1152.61	1291.9	331.891
80	1	323749	0.39966	0.47	47	6	1.1	0.456949	0.913897	0.952697	10	3.16103	8.86723	88.6723	1548	1735.08	1821.18	1614.88	1810.04	1279.42	1434.04	0.0320051	0.037638	0.432362	8.15714	0.815714	1150.1	1289.09	335.459
80	1	323749	0.403912	0.475	47.5	6	1.1	0.458563	0.917126	0.955926	10	3.14009	8.87084	88.7084	1548	1735.08	1821.18	1615.54	1810.78	1276.51	1430.78	0.0322348	0.0379081	0.437092	8.16289	0.816289	1147.58	1286.26	339.028
80	1	323749	0.408163	0.48	48	6	1.1	0.460167	0.920333	0.959133	10	3.1195	8.87441	88.7441	1548	1735.08	1821.18	1616.19	1811.5	1273.59	1427.5	0.0324637	0.0381773	0.441823	8.16857	0.816857	1145.04	1283.42	342.597
80	1	323749	0.412415	0.485	48.5	6	1.1	0.461759	0.923518	0.962318	10	3.09925	8.87792	88.7792	1548	1735.08	1821.18	1616.83	1812.22	1270.66	1424.22	0.0326919	0.0384457	0.446554	8.17418	0.817418	1142.5	1280.57	346.166
80	1	323749	0.416667	0.49	49	6	1.1	0.46334	0.926681	0.965481	10	3.07933	8.88139	88.8139	1548	1735.08	1821.18	1617.46	1812.93	1267.72	1420.93	0.0329193	0.0387131	0.451287	8.17971	0.817971	1139.94	1277.7	349.734
80	1	323749	0.420918	0.495	49.5	6	1.1	0.464911	0.929822	0.968622	10	3.05974	8.88482	88.8482	1548	1735.08	1821.18	1618.08	1813.63	1264.78	1417.63	0.0331459	0.0389796	0.45602	8.18517	0.818517	1137.36	1274.81	353.303
80	1	323749	0.42517	0.5	50	6	1.1	0.466471	0.932942	0.971742	10	3.04047	8.8882	88.882	1548	1735.08	1821.18	1618.7	1814.32	1261.83	1414.32	0.0333717	0.0392452	0.460755	8.19057	0.819057	1134.77	1271.91	356.872
